# Supplementary material for: Increased Apoptotic Activity in Low-Risk Myelodysplastic Syndrome
Source: MDPI journal article supplement (doi:10.3390/jcm11154604), 2022-08-07
Supplement: s1 [file s1]

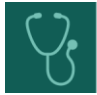

**Table S1.** Patient characteristics in the patients with ICUS ( $n = 37$ ) [5].

| Variables                                | Number of Patients (%) |
|------------------------------------------|------------------------|
| Age at diagnosis,<br>median (range)      | 66 (31–83)             |
| Sex                                      |                        |
| Male                                     | 15 (40.5)              |
| Female                                   | 22 (59.5)              |
| Neutropenia ( $ANC < 1800/\text{mm}^3$ ) | 28 (70.0)              |
| Anemia (Hemoglobin $< 10 \text{ g/dL}$ ) | 30 (75.0)              |
| Platelets ( $< 100,000/\text{mm}^3$ )    | 21 (52.5)              |
| Lineage involved of cytopenia            |                        |
| Uni-lineage                              | 8 (21.6)               |
| Bi-lineage                               | 22 (59.5)              |
| Tri-lineage                              | 7 (18.9)               |
| Grade of cytopenia                       |                        |
| 1                                        | 5 (13.5)               |
| 2                                        | 8 (21.6)               |
| 3                                        | 21 (56.8)              |
| 4                                        | 3 (8.1)                |

Abbreviations: ICUS, idiopathic cytopenia of undetermined significance; ANC, absolute neutrophil count.

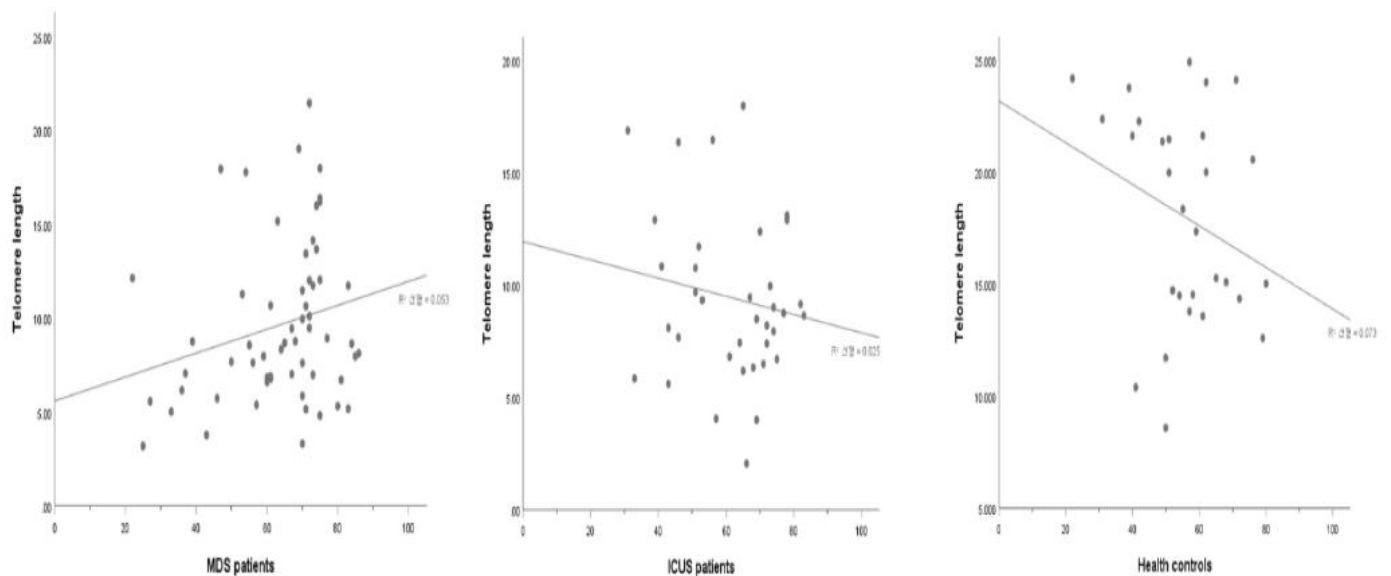

**Figure S1.** Telomere length according to age.

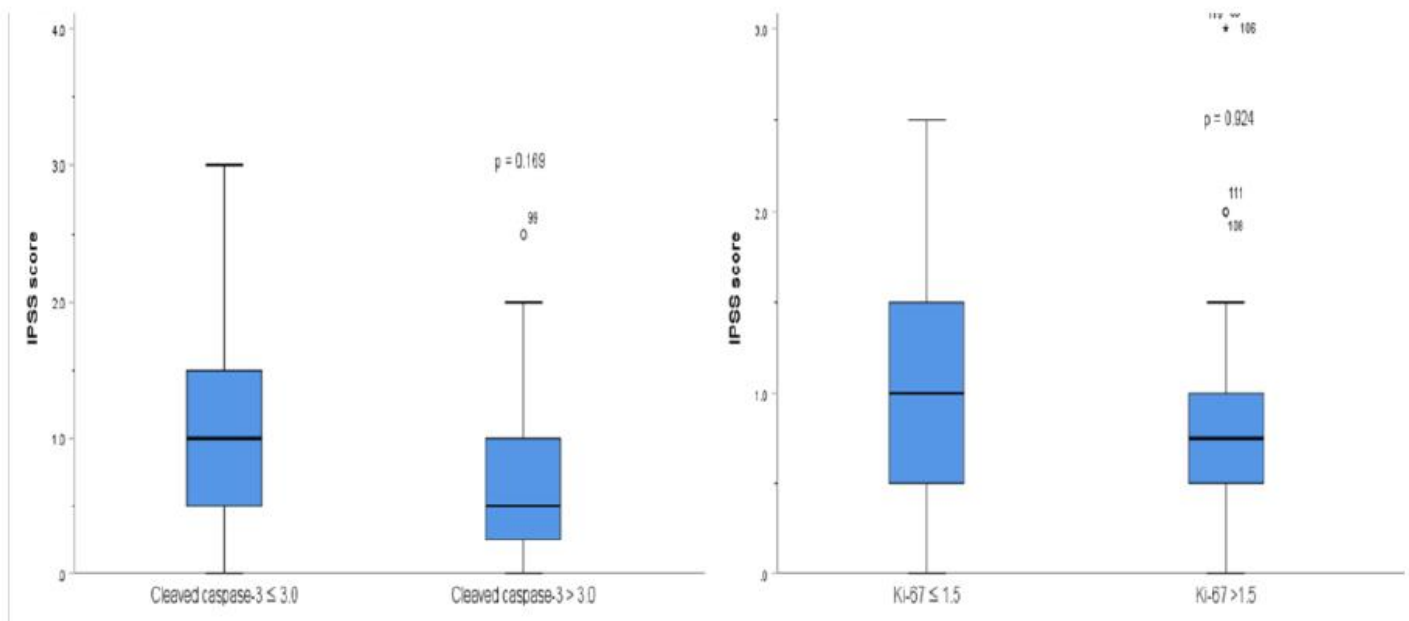

**Figure S2.** IPSS score according to cleaved caspase-3 and Ki-67. IPSS, International scoring prognostic system.
